# Supplementary material for: The effects of monovalent metal ions on the conformation of human telomere DNA using analytical ultracentrifugation
Source: Royal Society of Chemistry journal article supplement (doi:10.1039/c6sm01010e), 2016-01-01
Supplement: c6sm01010e1.pdf [file c6sm01010e1.pdf]

## Supporting Information

for

### The Effects of Monovalent Metal ions on the Conformation of Human Telomere DNA Using Analytical Ultracentrifugation

Yating Gao, Sha Wu and Xiaodong Ye \*

*Hefei National Laboratory for Physical Sciences at the Microscale, Department of Chemical Physics, University of Science and Technology of China, Hefei, Anhui 230026, China*

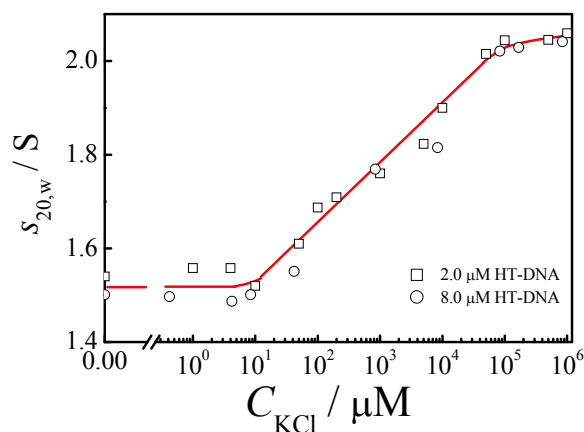

Figure S1. KCl concentration dependence of standard sedimentation coefficient of HT-DNA. The concentrations of HT-DNA were 2.0  $\mu M$  and 8.0  $\mu M$ , respectively.

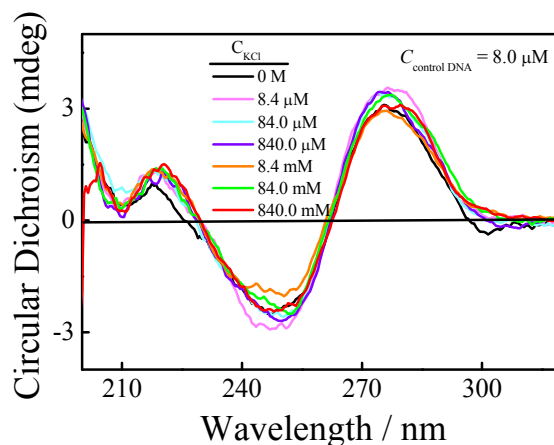

Figure S2. CD spectra of control DNA in the presence of different concentrations of KCl in a buffer solution (10.0 mM Tris/HCl, pH = 7.5) at 25 °C, where the concentration of control DNA was 8.0  $\mu M$ .
